# Supplementary material for: Structure of Salmonella Flagellar Hook Reveals Intermolecular Domain Interactions for the Universal Joint Function
Source: PubMed Central journal article supplement (PMC6769732; doi:10.3390/biom9090462), 2019-09-09
Supplement: biomolecules-09-00462-s001.pdf [file biomolecules-09-00462-s001.pdf]

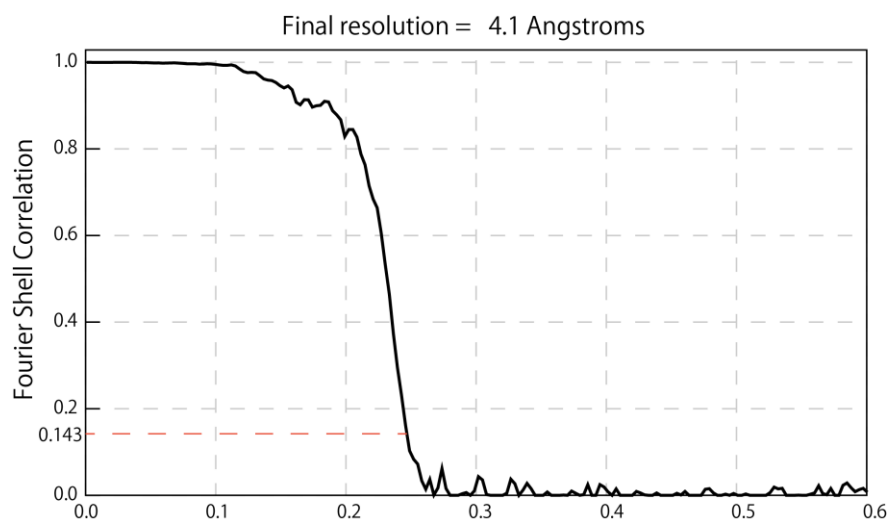

**Figure S1.** Fourier shell correlation of the 3D reconstruction.
